# Supplementary material for: A trustworthy CpG nanoplatform for highly safe and efficient cancer photothermal combined immunotherapy
Source: Royal Society of Chemistry journal article supplement (doi:10.1039/c9nr09402d), 2020-01-01
Supplement: c9nr09402d1.pdf [file c9nr09402d1.pdf]

## *Supporting Information*

### **A Trustworthy CpG Nanoplatfom for Highly Safe and Efficient Cancer Photothermal Combined Immunotherapy**

Jiang Ming,<sup>#a</sup> Jinjia Zhang,<sup>#b</sup> Yiran Shi,<sup>b</sup> Wangheng Yang,<sup>a</sup> Jingchao Li,<sup>a</sup> Duo Sun,<sup>a</sup>  
Sijin Xiang,<sup>a</sup> Xiaolan Chen,<sup>\*a</sup> Lanfen Chen<sup>\*b</sup> and Nanfeng Zheng<sup>\*a</sup>

*<sup>a</sup>State Key Laboratory for Physical Chemistry of Solid Surfaces, Collaborative Innovation Center of Chemistry for Energy Materials and Engineering, Research Center for Nano-Preparation Technology of Fujian Province, College of Chemistry and Chemical Engineering, Xiamen University, Xiamen 361005, China*

*<sup>b</sup>State Key Laboratory of Cellular Stress Biology, Innovation Center for Cell Signaling Network, School of Life Sciences, Xiamen University, Xiamen, Fujian 361102, China*

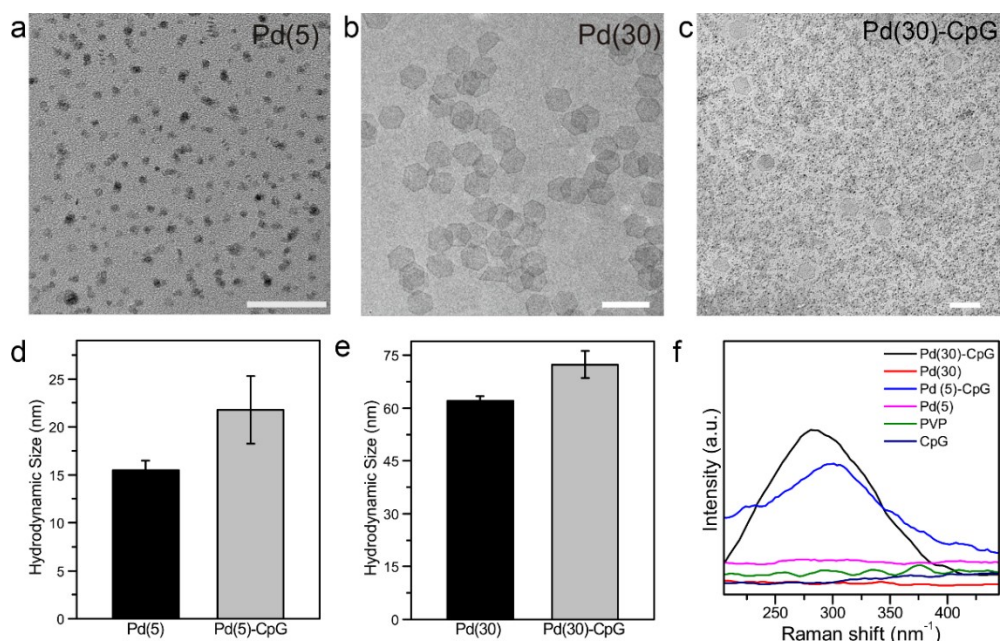

**Fig. S1** TEM images of Pd(5) (a) and Pd(30) (b). (c) TEM image of negative staining of Pd(30)-CpG by using uranyl acetate. The scale bar in a, b and c was 50 nm. The hydrodynamic sizes of Pd(5) and Pd(5)-CpG (d), and Pd(30) and Pd(30)-CpG (e), respectively. (f) Raman spectra of CpG, PVP, Pd NSs and Pd-CpG in the range of 200 to 450  $\text{cm}^{-1}$ , laser power (632 nm, 0.66 mW).

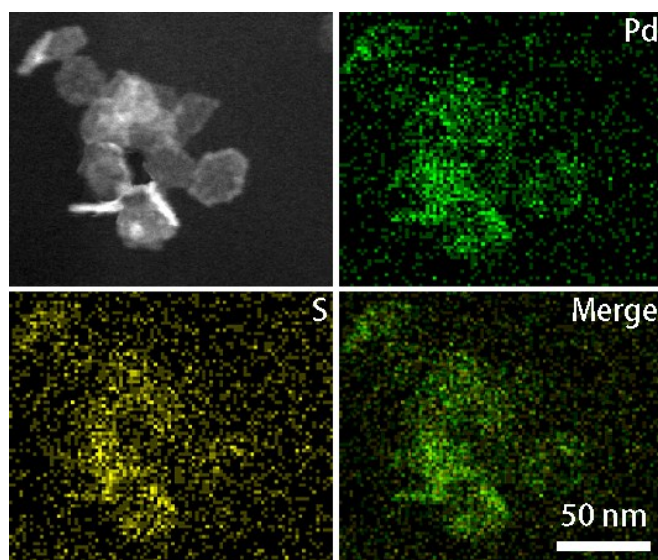

**Fig. S2** HAADF-STEM-EDX mapping images of Pd-CpG.

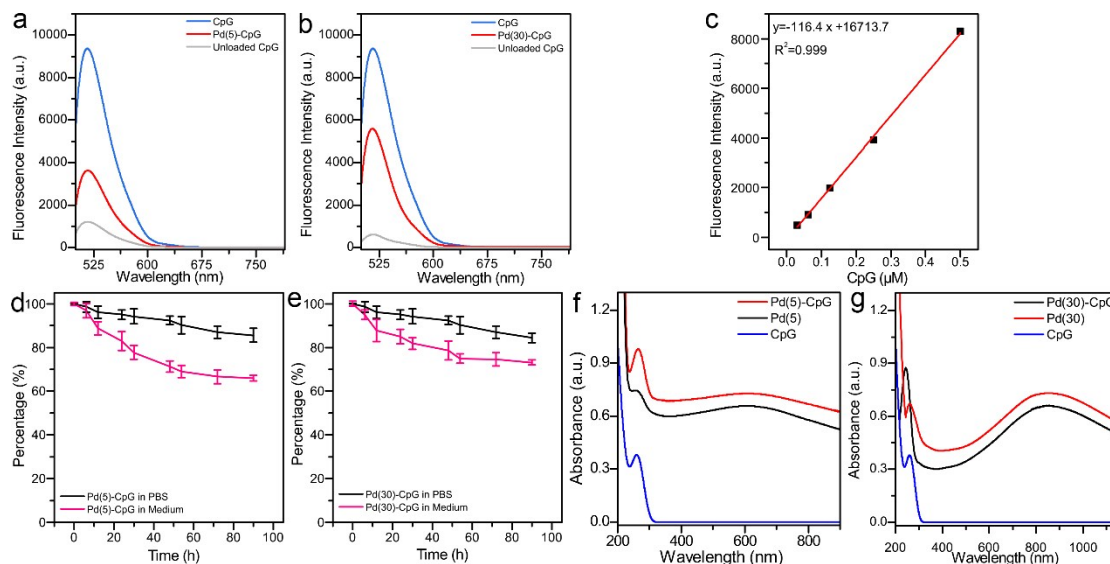

**Fig. S3** (a, b) Typical fluorescence spectra of FAM-labeled CpG, Pd NSs modified with FAM-labeled CpG and the unloaded FAM-labeled CpG. (c) Standard working curve of FAM-labeled CpG relative to fluorescence intensity. The loading stability of Pd(5)-CpG (d) and Pd(30)-CpG (e) in different media ( $n=3$  for each test). (f, g) UV-Vis-NIR absorption spectra of Pd-CpG, Pd NSs and CpG.

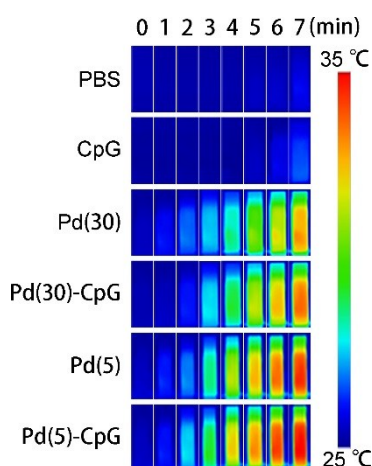

**Fig. S4** The *in vitro* IR thermal images of PBS, CpG, Pd(30), Pd(30)-CpG, Pd(5) and Pd(5)-CpG upon 808 nm laser irradiation at different time intervals. The power density of 808 nm laser was  $0.15 \text{ W cm}^{-2}$  and the concentration of Pd was 25 ppm.

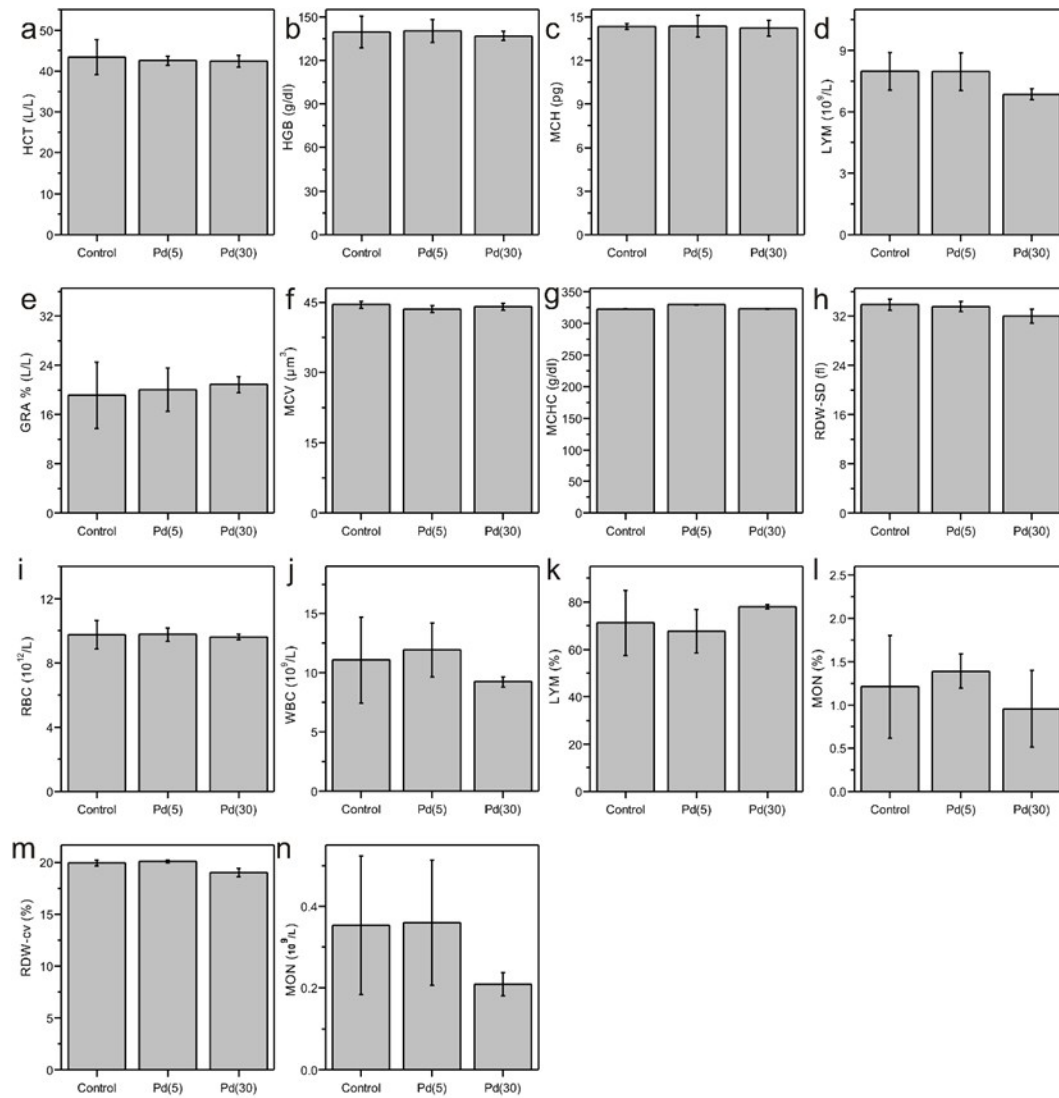

**Fig. S5** Routine analysis of blood of mice treated with Pd(5) and Pd(30) after 7 days (n=3 for each group). Mean values and error bars are defined as mean and S.D., respectively.

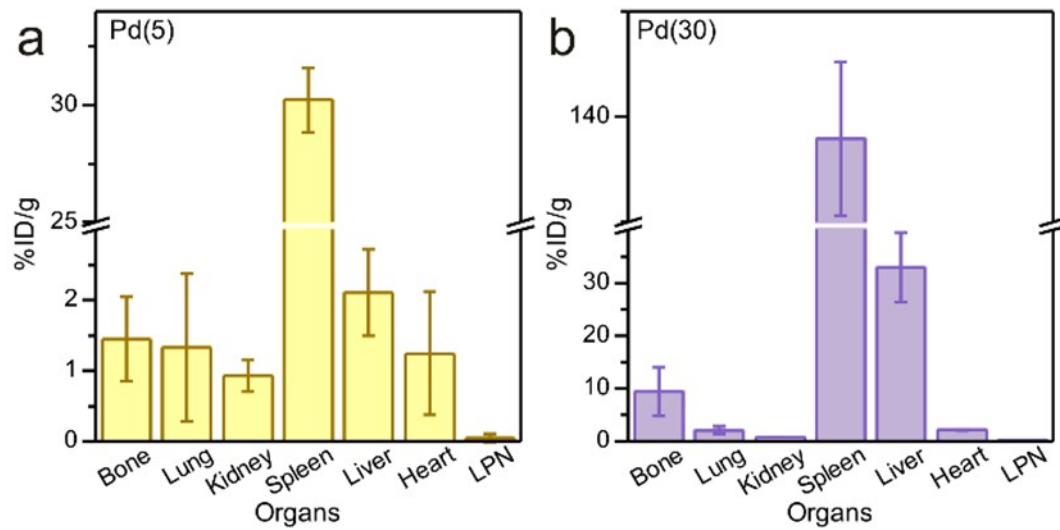

**Fig. S6** The biodistributions of Pd (% injected dose (ID) of Pd per gram of tissue) in main tissues at 7 days after intravenous administration of Pd(5) (a) and Pd(30) (b) (n=3 for each group). Mean values and error bars are defined as mean and S.D., respectively.

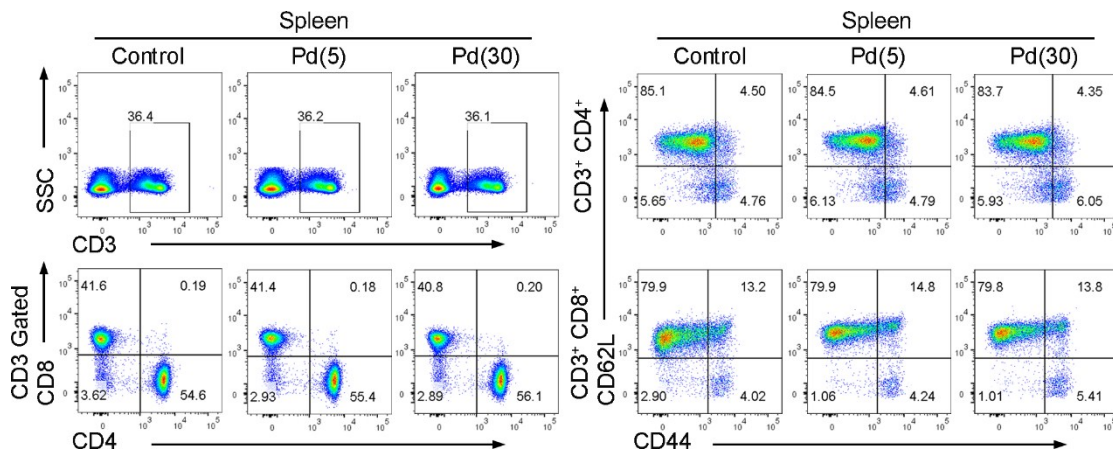

**Fig. S7** Flow cytometry analysis of CD3<sup>+</sup> T cells, CD4SP (CD3<sup>+</sup> CD4<sup>+</sup> CD8<sup>-</sup>)/CD8SP (CD3<sup>+</sup> CD4<sup>-</sup> CD8<sup>+</sup>), CD4<sup>+</sup>/CD8<sup>+</sup> Naïve T cells (CD44<sup>-</sup> CD62L<sup>+</sup>), Memory T cells (CD44<sup>+</sup> CD62L<sup>+</sup>), Effector T cells (CD44<sup>+</sup> CD62L<sup>-</sup>) from the spleen of mice (n=3 for each group).

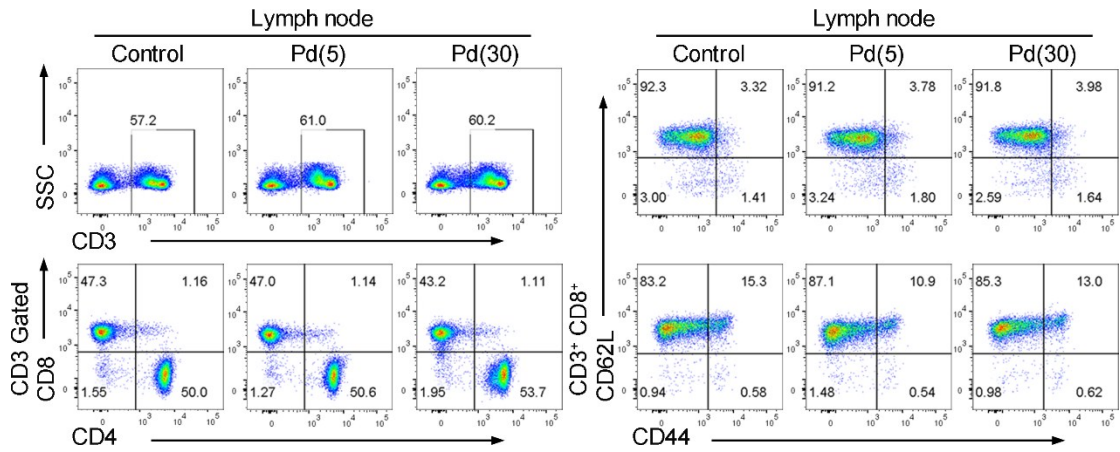

**Fig. S8** Flow cytometry analysis of CD3<sup>+</sup> T cells, CD4SP (CD3<sup>+</sup> CD4<sup>+</sup> CD8<sup>-</sup>)/CD8SP (CD3<sup>+</sup> CD4<sup>-</sup> CD8<sup>+</sup>), CD4<sup>+</sup>/CD8<sup>+</sup> Naïve T cells (CD44<sup>-</sup> CD62L<sup>+</sup>), Memory T cells (CD44<sup>+</sup> CD62L<sup>+</sup>), Effector T cells (CD44<sup>+</sup> CD62L<sup>-</sup>) from the lymph node of mice (n=3 for each group).

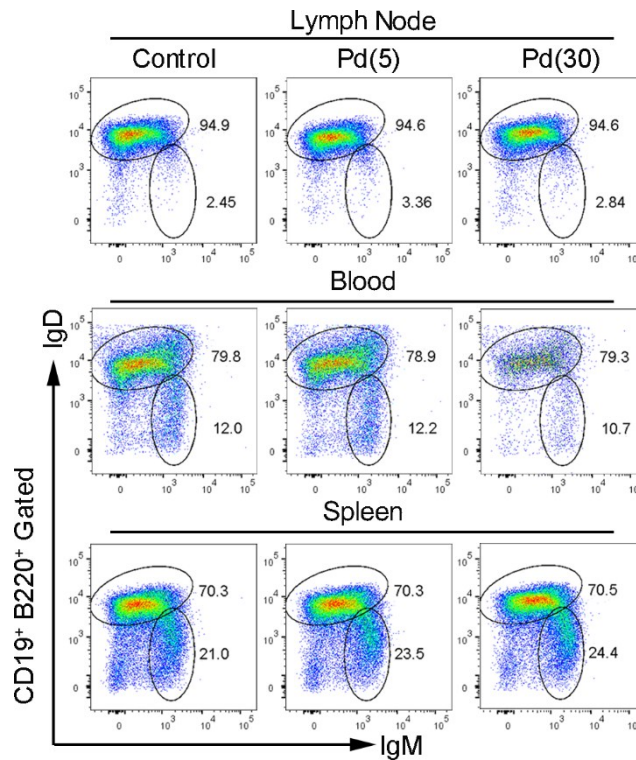

**Fig. S9** Flow cytometry analysis of the maturation B cells from lymph nodes, blood and spleen of mice (n=3 for each group).

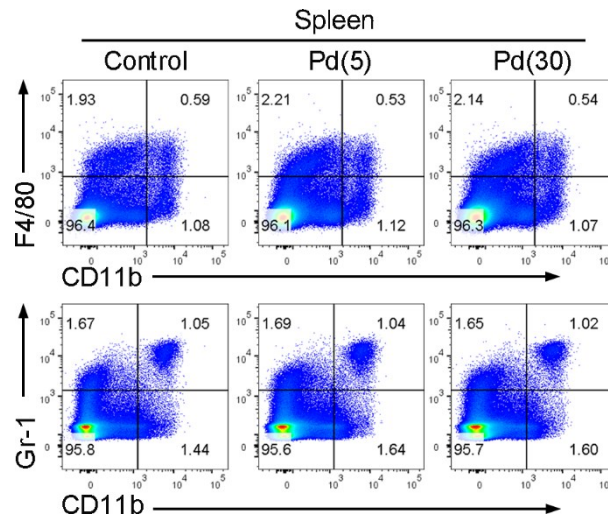

**Fig. S10** Flow cytometry analysis of macrophages and neutrophils from the spleen of mice (n=3 for each group).

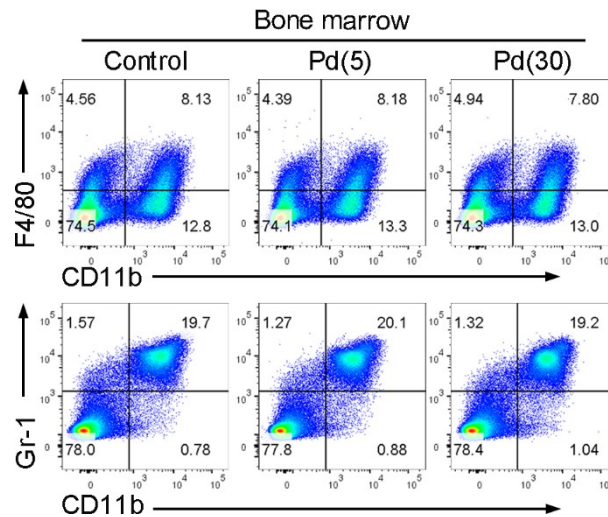

**Fig. S11** Flow cytometry analysis of macrophages and neutrophils from the bone marrow of mice (n=3 for each group).

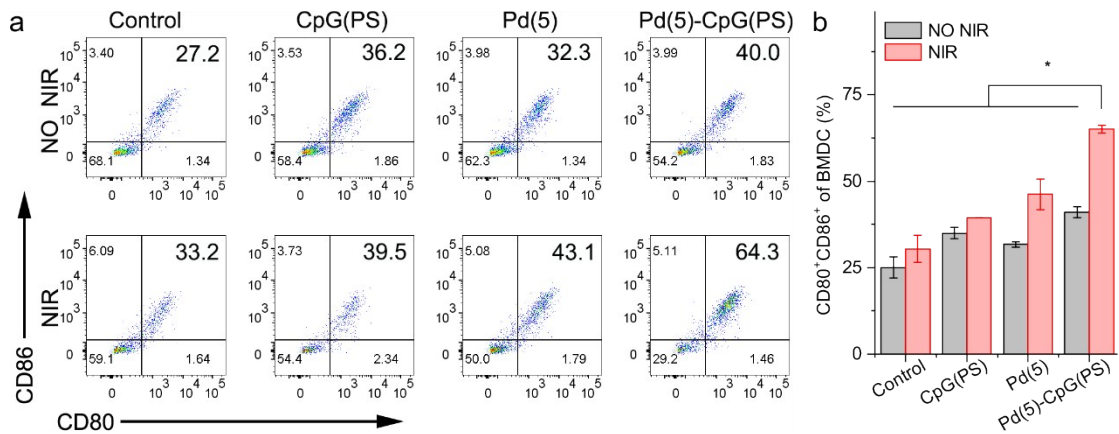

**Fig. S12** Flow cytometry analysis of dendritic cell (DC) maturation after various treatments. The DC cells were stained with anti-CD80 and anti-CD86 (n=3 for each group). \*p<0.05.

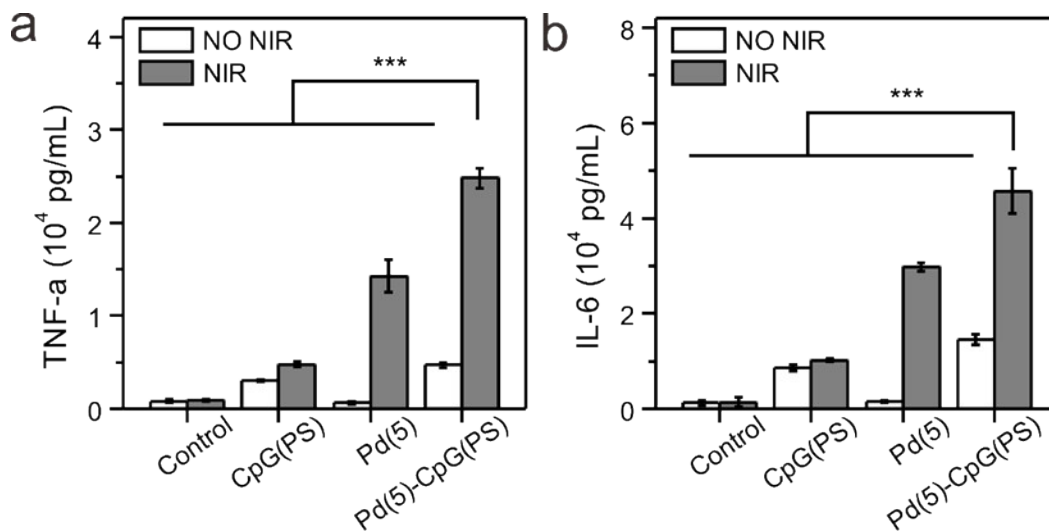

**Fig. S13** Comparison of the TNF- $\alpha$  (a) and IL-6 (b) releases in DCs culture stimulated by PBS, CpG(PS), Pd(5) and Pd(5)-CpG(PS) without or with NIR irradiation (808 nm, 0.15 W cm<sup>-2</sup>, 5 min), respectively.



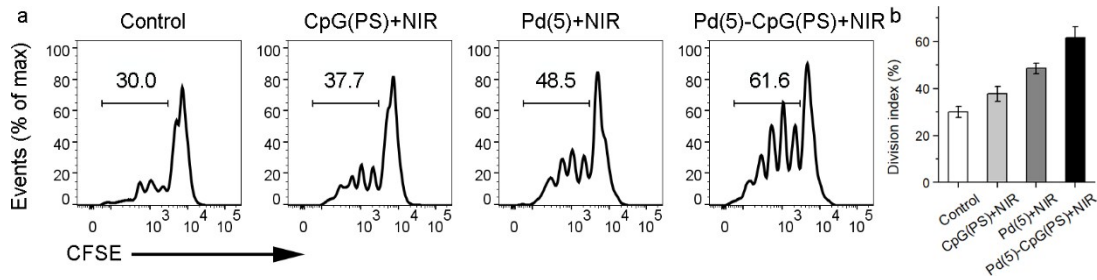

**Fig.S14** The activation of CD8<sup>+</sup> T cells stimulated by matured DCs. DCs were first incubated with supernatant from Pd(5)-CpG(PS)+NIR treated B16F10-OVA (or other controls). BMDCs were then subjected to an *in vitro* presentation assay using CFSE-labeled CD8<sup>+</sup> T cells (n=4 for each group).

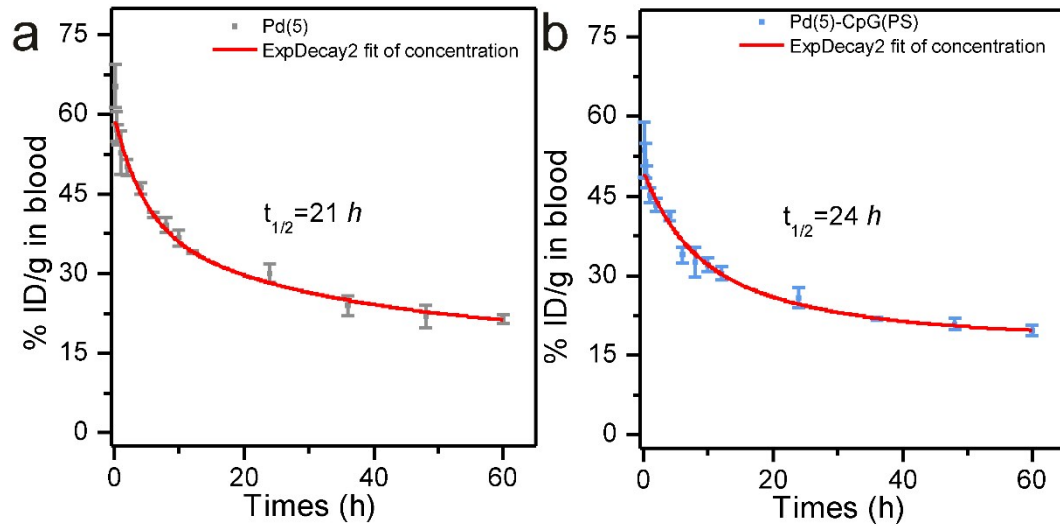

**Fig. S15** Pharmacokinetics studies of Pd(5) and Pd(5)-CpG(PS). The blood circulation curves of intravenously injected Pd(5) (a) and Pd(5)-CpG(PS) (b) (n = 5). The half-lives ( $t_{1/2}$ ) for Pd(5) and Pd(5)-CpG(PS) were calculated to be ~21 h and ~24 h, respectively.

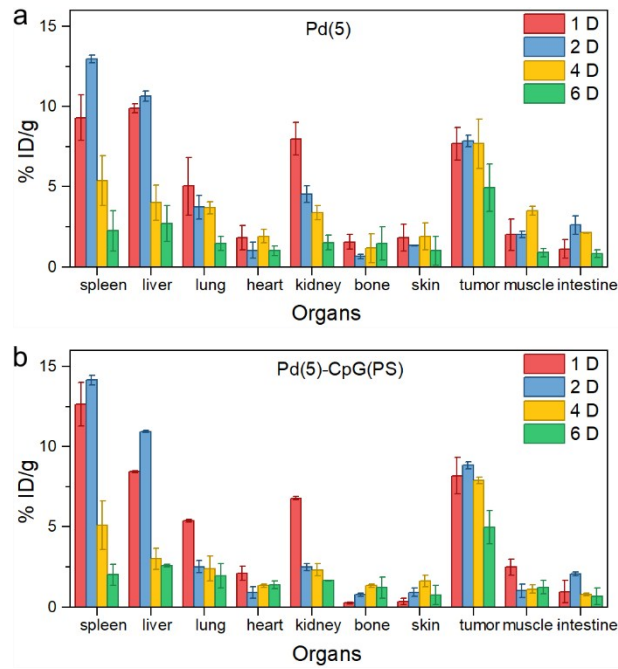

**Fig. S16** The biodistributions of Pd (% injected dose (ID) of Pd per gram of tissue) in main tissues and tumors in 1, 2, 4 and 6 days after intravenous administration of Pd(5) (a) and Pd(5)-CpG(PS) (b). Mean values and error bars are defined as mean and S.D., respectively (n=5).

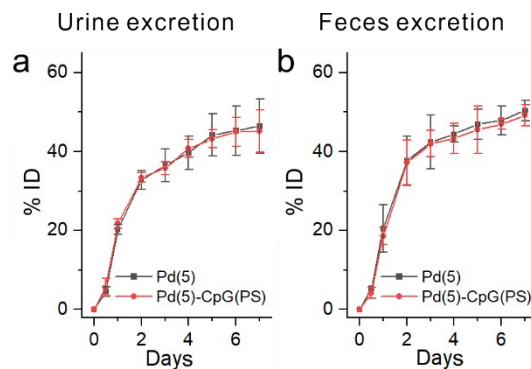

**Fig. S17** Urine and feces excretion of Pd(5) and Pd(5)-CpG(PS) (n=3).

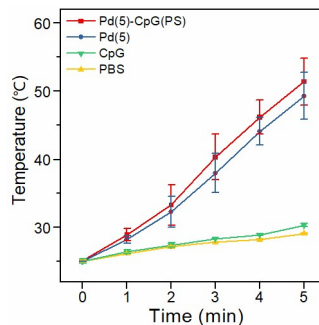

**Fig. S18** The temperature increase profiles of tumor tissues in mice during laser irradiation. The power density of 808 nm laser was  $0.15 \text{ W cm}^{-2}$ .

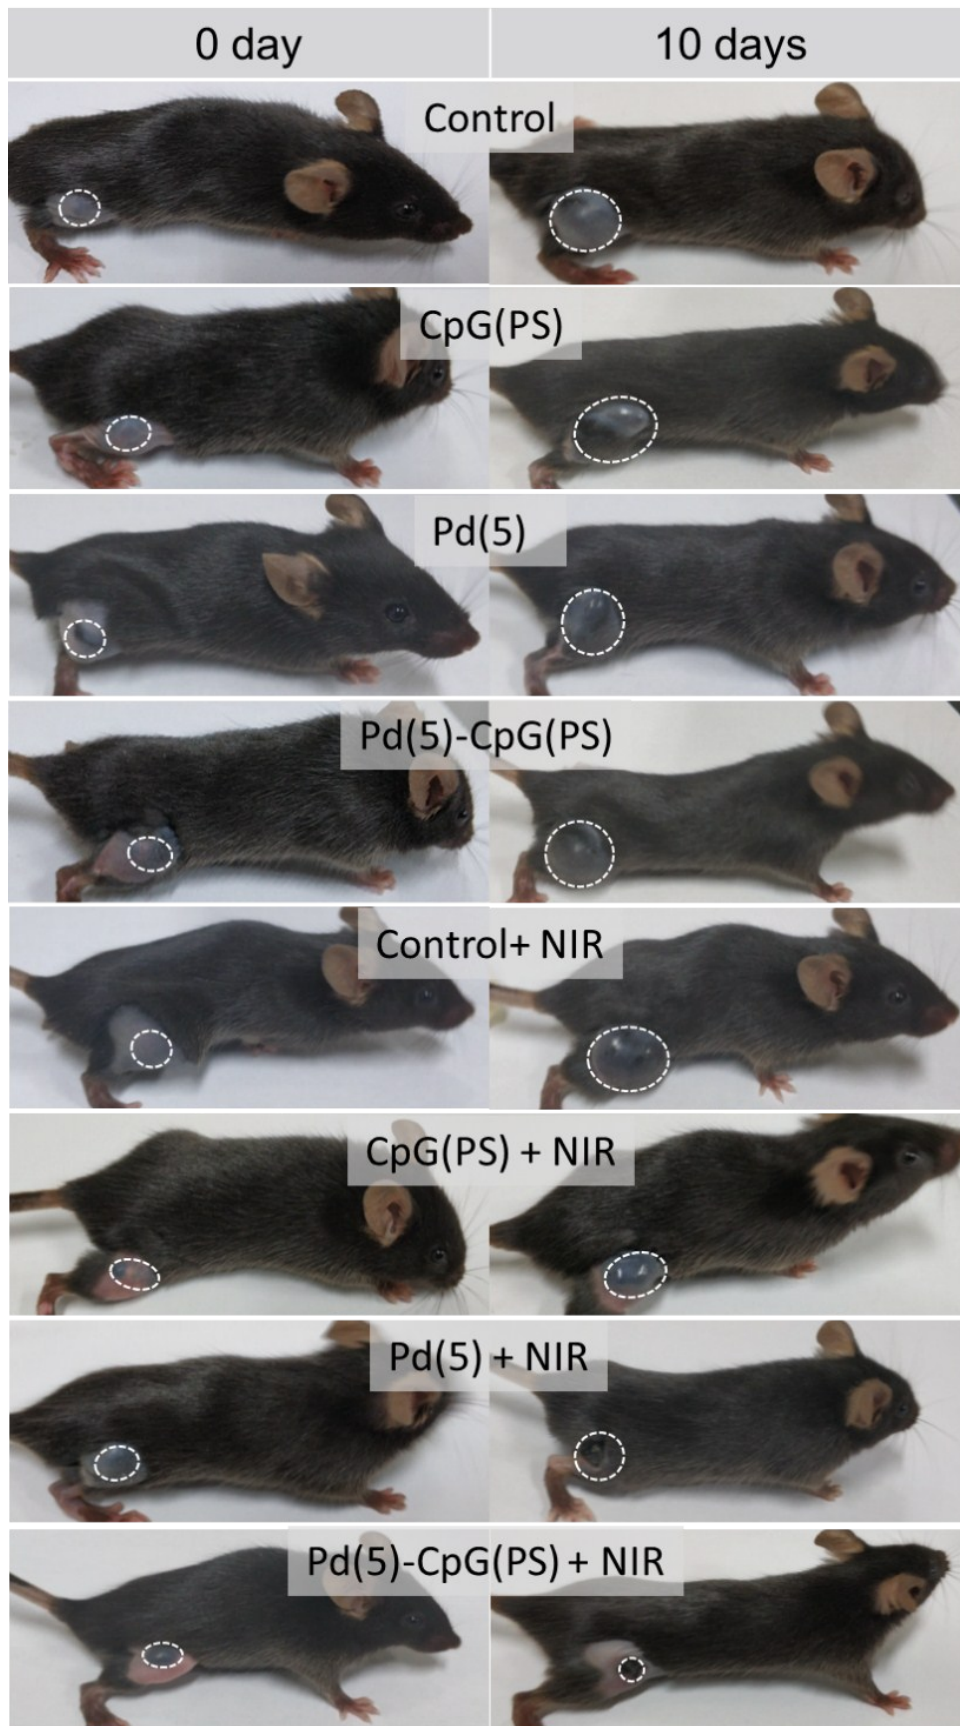

**Fig. S19** Optical photos of mice before and after treatment at different treated groups.

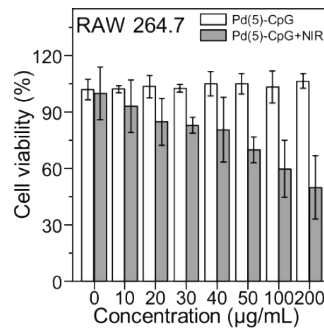

**Fig. S20** PTT effect of Pd(5)-CpG on RAW 264.7 cells. The laser power density of 808 nm was  $0.15 \text{ W cm}^{-2}$ .

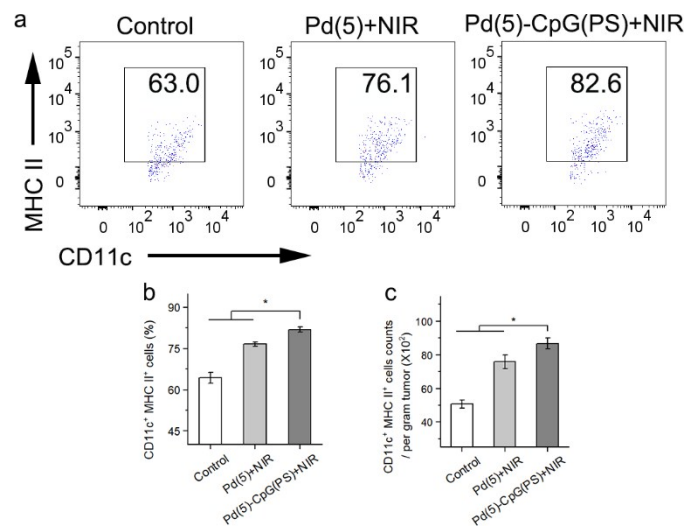

**Fig. S21** The matured APCs (CD11c<sup>+</sup>MHC II<sup>+</sup>) both in percentage (b) and number (c) in tumor after different treatments (n=4 for each group).

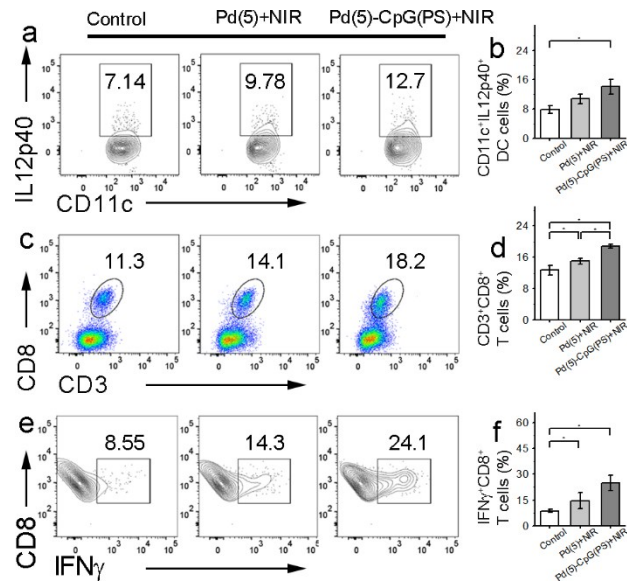

**Fig. S22** CD11c<sup>+</sup> IL12p40<sup>+</sup> cells (a and b), CD3<sup>+</sup> CD8<sup>+</sup> cells (c and d) and IFN $\gamma$  CD8<sup>+</sup> cells (e and f) from the spleen of mice (n=4 for each group).

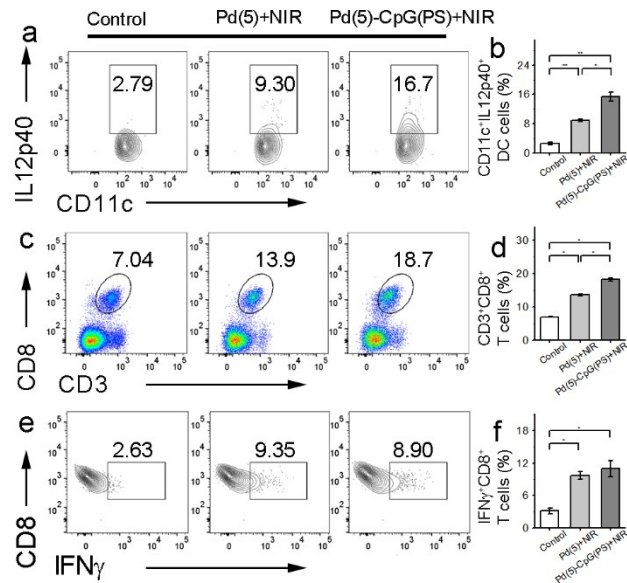

**Fig. S23** CD11c<sup>+</sup> IL12p40<sup>+</sup> cells (a and b), CD3<sup>+</sup> CD8<sup>+</sup> cells (c and d) and IFN $\gamma$  CD8<sup>+</sup> cells (e and f) from the blood of mice (n=4 for each group).

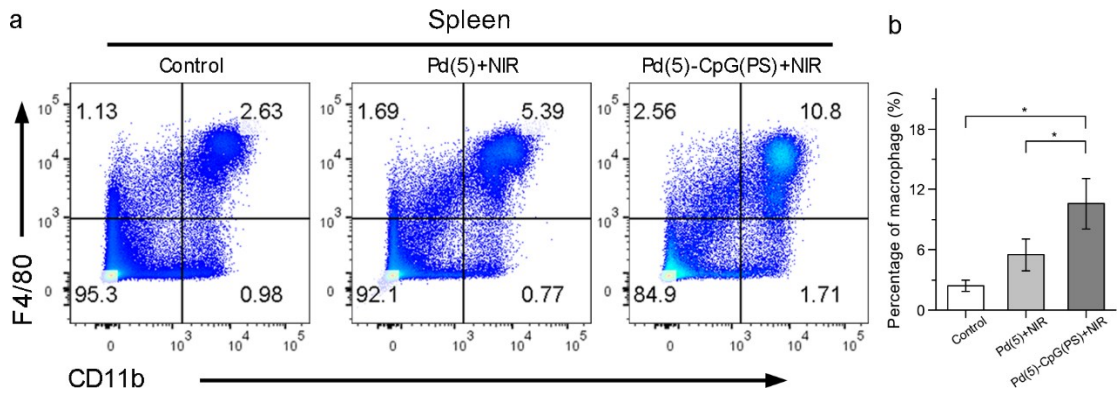

**Fig. S24** Flow cytometry analysis of macrophage (a and b) from the spleen of mice (n=4 for each group).

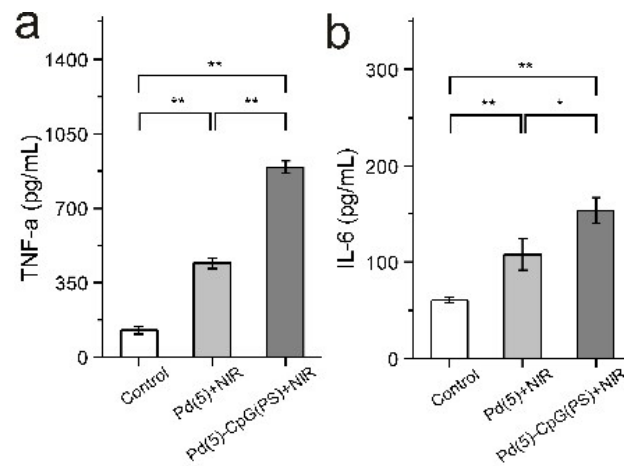

**Fig. S25** Concentrations of TNF- $\alpha$  (a) and IL-6 (b) in the sera of different groups treated mice (Control, Pd(5)+NIR and Pd(5)-CpG(PS)+NIR).

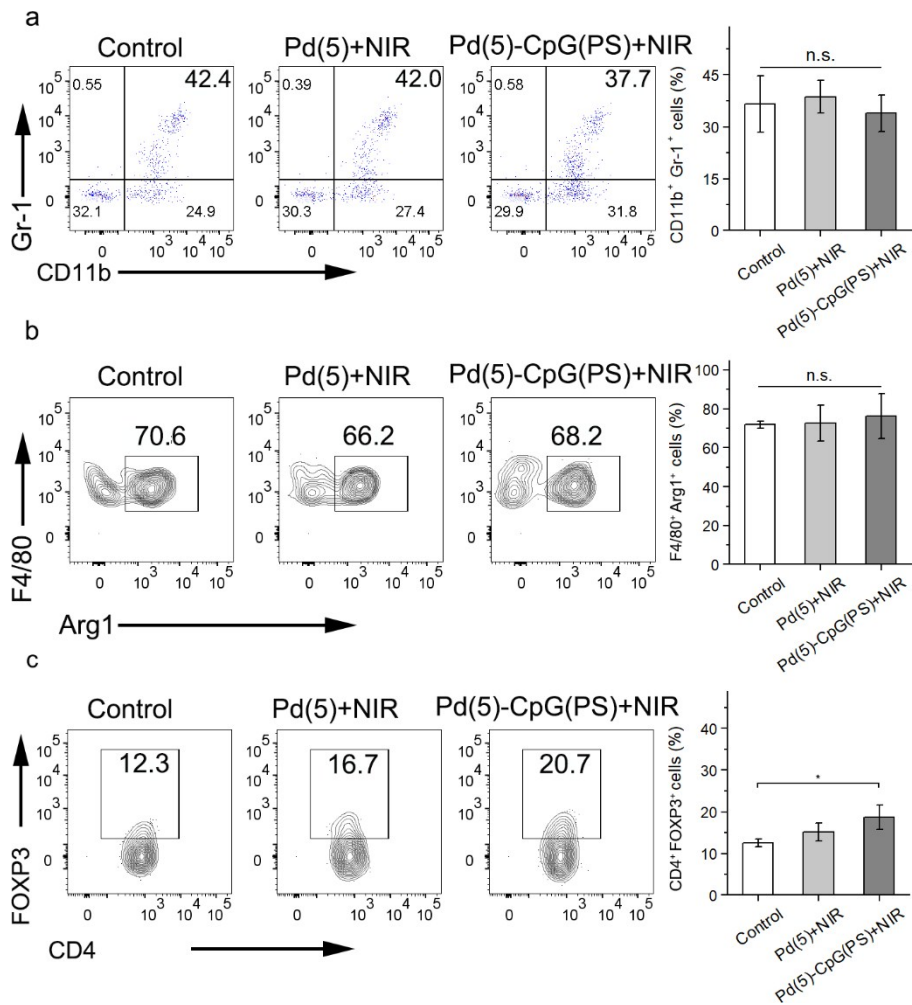

**Fig. S26** Flow cytometry analysis of MDSCs (CD11b<sup>+</sup>Gr-1<sup>+</sup>), M2 macrophages (Arg1<sup>+</sup>F4/80<sup>+</sup>) and Treg cells (CD4<sup>+</sup>FOXP3<sup>+</sup>) in tumor after Pd(5)+NIR and Pd(5)-CpG(PS)+NIR treatment (n=4 for each group).
